# Supplementary material
Source: publisher figshare collection journal article supplement (https://acs.figshare.com/ndownloader/files/5755065)
Supplement: Supplementary file 1 [file 5755065]

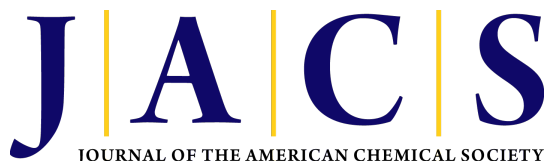

JOURNAL OF THE AMERICAN CHEMICAL SOCIETY

J. Am. Chem. Soc., 1997, 119(35), 8350-8360, DOI:[10.1021/ja970870p](https://doi.org/10.1021/ja970870p)

#### Terms & Conditions

Electronic Supporting Information files are available without a subscription to ACS Web Editions. The American Chemical Society holds a copyright ownership interest in any copyrightable Supporting Information. Files available from the ACS website may be downloaded for personal use only. Users are not otherwise permitted to reproduce, republish, redistribute, or sell any Supporting Information from the ACS website, either in whole or in part, in either machine-readable form or any other form without permission from the American Chemical Society. For permission to reproduce, republish and redistribute this material, requesters must process their own requests via the RightsLink permission system. Information about how to use the RightsLink permission system can be found at <http://pubs.acs.org/page/copyright/permissions.html>

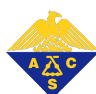

ACS Publications

MOST TRUSTED. MOST CITED. MOST READ.

Copyright © 1997 American Chemical Society

## Supplementary Text

**Correlation of BDE's with changes in spin populations: invariance with respect to definition of atomic populations.** Various schemes exist for calculating atomic electron populations, and from them atomic charges, using molecular wave functions.<sup>1</sup> The most common is the Mulliken definition,<sup>2</sup> although its shortcomings are well documented.<sup>3,4</sup> The great variety of procedures available for defining atomic populations, and the wide disparity in the numerical results obtained from them, leads to some level of difficulty in drawing useful conclusions from such analyses. It is not unusual for the population of an atom to vary by an entire electron, or even more, depending on the particular definition of charge used to perform the calculation. However, the paragraphs below demonstrate that the correlation between B-H BDE and spin density delocalization described in the main body of the paper and illustrated graphically in Figure 6 is not an artifact of using a particular definition of atomic population.

Despite the large and well-documented inconsistencies between definitions, atomic populations derived for an entire series of molecules using a given procedure usually correlate very closely with those calculated for the same series of molecules using some other procedure.<sup>1</sup> These correlations are not equally good for all pairs of definitions of charge, nor do the best fit lines generally have a slope of one or an intercept of zero. Nonetheless, *differences* in atomic populations, when assessed consistently using a single reasonable definition, are still likely to be meaningful. Using two quite different procedures and comparing the results provides an even greater degree of confidence if both approaches lead to the same conclusions.

Many of the procedures that yield atomic populations can equally well provide atomic spin density populations, and it is possible to quantify the earlier discussion of spin density distribution using such an approach. Two quite dissimilar definitions have been chosen for the present application: the Atoms in Molecules (AIM) approach of Bader<sup>5,6,7</sup> and the Natural Population Analysis (NPA) of Weinhold.<sup>8,9</sup> The former is based on a division of physical space according to

topological principles into regions belonging to the various atoms comprising a molecule, while the latter represents a modification of the Mulliken procedure that largely removes the problem of basis set dependence.

Table 4 lists both the AIM and NPA atomic spin density populations of the borane radicals, and shows that the B-H BDE is correlated with the delocalization of spin density, as described previously. The data are presented graphically in Figure 6, which plots the BDE against the fraction of alpha spin density found on atoms *other* than the BH<sub>2</sub> fragment in each radical ( $R^2 = 0.96$ ). Importantly, the correlation is demonstrated equally well using the NPA populations, as shown in Figure A ( $R^2 = 0.97$ ). The similarity results from the aforementioned fact that the NPA and AIM populations, while numerically very dissimilar, nonetheless often show an excellent correlation, as illustrated in Figure B (slope = 1.022, correlation coefficient = 0.98). This close correspondence suggests that the foregoing discussion is not invalidated by the unavoidably arbitrary nature of all definitions of atomic charge.

**Correlation of BDE's with changes in atomic population.** Interestingly, the correlation between electron population and BDE extends to the total populations as well as the spin densities, if one considers the change in the electronic population of the BH<sub>n</sub> fragment that takes place upon hydrogen atom abstraction. This change is defined simply as the population of the BH<sub>2</sub> fragment in the radical minus that of the BH<sub>3</sub> fragment in the parent complex. Figure C shows the relationship between this population difference and the BDE for the hydrogen abstraction process. The excellent correlation ( $R^2 = 0.97$ ) mirrors that in Figure 6 (BDE versus spin density). Once again, the AIM and NPA procedures for defining electronic population yield the same qualitative result; a plot of the population difference computed via NPA versus that computed via AIM yields a best fit line with a correlation coefficient of 0.998 and a slope of 0.79. The changes are consistently ~25% larger with AIM than with NPA, but are related in a rigorously linear fashion.

**Demonstration that geometric constraints do not significantly complicate the interpretation of difference densities for complexation.** Figures 9 and 10 illustrate the reorganization of charge density that occurs as the result of complexation of various Lewis bases with borane. A complication arises in their interpretation because of the changes in geometry that occur during complexation. To avoid artifacts associated with the movement of atoms, the geometries of the "isolated" molecules in the subtraction procedure must be identical to the geometries used in the complexes. For instance, in the calculation for  $\text{BH}_3\cdot\text{NH}_3$ , the  $\text{BH}_3$  and  $\text{NH}_3$  wave functions were those for  $\text{BH}_3$  and  $\text{NH}_3$  *at the exact geometries they hold in the  $\text{BH}_3\cdot\text{NH}_3$  complex*.

As the changes in molecular geometry that accompany complexation can be quite substantial, there is some ambiguity in the interpretation of the difference density distributions.<sup>10</sup> How much of the charge redistribution derives from complexation, and how much from geometric change within the fragments? In order to answer this question, NPA atomic populations were computed for the isolated component molecules both at their equilibrium geometries and also at their geometries in the complexes. The resulting differences, which are listed in Table C, were taken to indicate the amount of charge redistribution directly related to the changes in geometry. The calculated differences were generally much smaller than the charge redistribution resulting from complexation, with a mean absolute value of 0.010 electrons, and a maximal value of 0.070 electrons for the case of  $\text{BH}_2\cdot\text{OCH}_2$ . Consequently, the charge density perturbations depicted in Figures 9 and 10 mostly reflect the complexation process itself, and are only modestly "contaminated" by the associated geometry changes.

**Correlation of strength of association with orbital energies.** In so far as the complexation of borane to Lewis bases can be described in terms of frontier molecular orbital interactions (HOMO on the Lewis base, LUMO on the borane), one might expect the strength of coordination to correlate with the HOMO-LUMO energy gap. Since the LUMO is the same in all cases -- the empty p orbital on boron -- one might predict a correlation between the HOMO

energy of the Lewis base and the complexation enthalpy. The LUMO energies are listed in Table D. However, plotting the HF/6-311++G\*\*(6d)//MP2/6-31G\* HOMO energy against the dissociation enthalpy yields a correlation coefficient of only 0.49.

It is likely that not only the energy but also the spatial orientation and diffuseness of the HOMO influences its interaction with the LUMO on boron. A diffuse lone pair orbital cannot overlap with the LUMO as effectively as a compact one. It might be possible to compensate for this effect in at least an approximate fashion by using localized MO's instead of the canonical MO's, since the localized MO's ought in general to have shapes and orientations optimal for intermolecular interaction. The optimization process might minimize differences in lone pair "availability" from one species to the next.

The NBO procedure of Weinhold and Reed<sup>8,9,11</sup> that is included in the Gaussian 94 ab initio package<sup>12</sup> yields localized MO's that can be used for this purpose. The use of localized orbitals substantially improved the correlation of HOMO-LUMO gap with complexation enthalpy, raising the correlation coefficient to 0.84, but still did not provide a truly convincing quantitative relationship. Use of QCISD orbital energies instead of HF energies made essentially no difference at all. The absence of a strong correlation probably results from the dependence of interaction strength on not only orbital energy but also the extent of orbital overlap, for which the localization procedure does not adequately compensate. The orbital energies relevant to the above discussion are provided in Table D.

## Notes and References.

- 
- <sup>1</sup> Wiberg, K. B.; Rablen, P. R. *J. Comput. Chem.* **1993**, *14*, 1504-1518.
  - <sup>2</sup> Mulliken, R. S. *J. Chem. Phys.* **1962**, *36*, 3428-3429.
  - <sup>3</sup> Politzer, P.; Mulliken, R. S. *J. Chem. Phys.* **1971**, *55*, 5135-5137.
  - <sup>4</sup> Grier, D. D.; Streitwieser, A. Jr., *J. Am. Chem. Soc.* **1982**, *104*, 3556-3564.
  - <sup>5</sup> Bader, R. F. W. *Atoms in Molecules*; Clarendon Press: Oxford, UK, 1990.
  - <sup>6</sup> Bader, R. F. W., *Chem. Rev.* **1991**, *91*, 893-928.
  - <sup>7</sup> Bader, R. F. W. *Acc. Chem. Res.* **1985**, *18*, 9-15.
  - <sup>8</sup> Reed, A. E.; Weinstock, R. B.; Weinhold, F. *J. Chem. Phys.* **1985**, *83*, 735-746.
  - <sup>9</sup> Reed, A. E.; Curtiss, L. A.; Weinhold, F. *Chem. Rev.* **1988**, *88*, 899-926.
  - <sup>10</sup> Wiberg, K. B.; Rablen, P. R. *J. Am. Chem. Soc.* **1995**, *117*, 2201-2209. Wiberg, K. B.; Rablen, P. R. *J. Am. Chem. Soc.* **1993**, *115*, 9234-9242.
  - <sup>11</sup> Glendening, E. D.; Reed, A. E.; Carpenter, J. E.; Weinhold, F. *NBO Version 3.1*.
  - <sup>12</sup> Frisch, M. J.; Trucks, G. W.; Schlegel, H. B.; Gill, P. M. W.; Johnson, B. G.; Robb, M. A.; Cheeseman, J. R.; Keith, T.; Petersson, G. A.; Montgomery, J. A.; Raghavachari, K.; Al-Laham, M. A.; Zakrzewski, V. G.; Ortiz, J. V.; Foresman, J. B.; Cioslowski, J.; Stefanov, B. B.; Nanayakkara, A.; Challacombe, M.; Peng, C. Y.; Ayala, P. Y.; Chen, W.; Wong, M. W.; Andres, J. L.; Replogle, E. S.; Gomperts, R.; Gonzalez, C.; Martin, R. L.; Fox, D. J.; Binkley, J. S.; Defrees, D. J.; Baker, J.; Stewart, J. P.; Head-Gordon, M.; Gonzalez, C.; Pople, J. A. *Gaussian 94* (Revision C.2); Gaussian, Inc., Pittsburgh PA, 1995.

**Table A.** G-2 and CBS-4 total enthalpies (Hartrees).

| Structure                          | Symmetry        | State | 0 K <sup>a</sup>       |            | 0 K to 298 K Increment <sup>b</sup> |         |
|------------------------------------|-----------------|-------|------------------------|------------|-------------------------------------|---------|
|                                    |                 |       | G-2                    | CBS-4      | G-2                                 | CBS-4   |
| H                                  | K <sub>h</sub>  | 2     | -0.50000               | -0.50335   | 0.00236                             | 0.00236 |
| BH <sub>2</sub>                    | C <sub>2v</sub> | 2     | -25.85726 <sup>c</sup> | -25.86744  | 0.00381                             | 0.00381 |
| BH <sub>3</sub>                    | D <sub>3h</sub> | 1     | -26.52486 <sup>c</sup> | -26.53660  | 0.00384                             | 0.00384 |
| B <sub>2</sub> H <sub>5</sub>      | C <sub>2v</sub> | 2     | -52.44782              | -52.47117  | 0.00482                             | 0.00476 |
| B <sub>2</sub> H <sub>6</sub>      | D <sub>2h</sub> | 1     | -53.10751              | -53.13182  | 0.00456                             | 0.00451 |
| NH <sub>3</sub>                    | C <sub>3v</sub> | 1     | -56.45865              | -56.47365  | 0.00381                             | 0.00386 |
| H <sub>2</sub> O                   | C <sub>2v</sub> | 1     | -76.33205              | -76.34858  | 0.00379                             | 0.00379 |
| PH <sub>3</sub>                    | C <sub>3v</sub> | 1     | -342.67903             | -342.68642 | 0.00385                             | 0.00384 |
| H <sub>2</sub> S                   | C <sub>2v</sub> | 1     | -398.93070             | -398.93532 | 0.00379                             | 0.00379 |
| CO                                 | C <sub>∞v</sub> | 1     | -113.17750             | -113.18898 | 0.00330                             | 0.00331 |
| H <sub>2</sub> CO                  | C <sub>2v</sub> | 1     | -114.33892             | -114.35829 | 0.00381                             | 0.00381 |
| HCN                                | C <sub>∞v</sub> | 1     | -93.28489              | -93.29258  | 0.00346                             | 0.00341 |
| HNC                                | C <sub>∞v</sub> | 1     | -93.26210              | -93.27309  | 0.00378                             | 0.00357 |
| CH <sub>3</sub> OCH <sub>3</sub>   | C <sub>2v</sub> | 1     |                        | -154.78280 |                                     | 0.00535 |
| CH <sub>3</sub> CN                 | C <sub>3v</sub> | 1     |                        | -132.54562 |                                     | 0.00442 |
| CH <sub>3</sub> SCH <sub>3</sub>   | C <sub>2v</sub> | 1     |                        | -477.40125 |                                     | 0.00583 |
| (CH <sub>3</sub> ) <sub>2</sub> CO | C <sub>2v</sub> | 1     |                        | -192.85938 |                                     | 0.00627 |
| N(CH <sub>3</sub> ) <sub>3</sub>   | C <sub>3v</sub> | 1     |                        | -174.15521 |                                     | 0.00654 |
| P(CH <sub>3</sub> ) <sub>3</sub>   | C <sub>3v</sub> | 1     |                        | -460.41718 |                                     | 0.00757 |
| (CH <sub>3</sub> ) <sub>2</sub> SO | C <sub>s</sub>  | 1     |                        | -552.52964 |                                     | 0.00650 |
| THF                                | C <sub>2</sub>  | 1     |                        | -232.07369 |                                     | 0.00590 |
| pyridine                           | C <sub>2v</sub> | 1     |                        | -247.88073 |                                     | 0.00510 |
| BH <sub>2</sub> NH <sub>3</sub>    | C <sub>s</sub>  | 1     | -82.36231              | -82.38843  | 0.00492                             | 0.00486 |
| BH <sub>3</sub> NH <sub>3</sub>    | C <sub>3v</sub> | 1     | -83.02505              | -83.05293  | 0.00495                             | 0.00486 |
| BH <sub>2</sub> OH <sub>2</sub>    | C <sub>1</sub>  | 2     | -102.20693             | -102.23145 | 0.00538                             | 0.00527 |
| BH <sub>3</sub> OH <sub>2</sub>    | C <sub>s</sub>  | 1     | -102.87330             | -102.89892 | 0.00547                             | 0.00525 |
| BH <sub>2</sub> PH <sub>3</sub>    | C <sub>s</sub>  | 2     | -368.58897             | -368.61216 | 0.00542                             | 0.00541 |
| BH <sub>3</sub> PH <sub>3</sub>    | C <sub>3v</sub> | 1     | -369.23661             | -369.25969 | 0.00565                             | 0.00557 |
| BH <sub>2</sub> SH <sub>2</sub>    | C <sub>s</sub>  | 2     | -424.82515             | -424.83979 | 0.00698                             | 0.00686 |
| BH <sub>3</sub> SH <sub>2</sub>    | C <sub>s</sub>  | 1     | -425.47471             | -425.48169 | 0.00657                             | 0.00630 |
| BH <sub>2</sub> CO                 | C <sub>2v</sub> | 2     | -139.11144             | -139.13684 | 0.00473                             | 0.00462 |
| BH <sub>3</sub> CO                 | C <sub>3v</sub> | 1     | -139.73669             | -139.76045 | 0.00508                             | 0.00493 |
| BH <sub>2</sub> COH                | C <sub>s</sub>  | 1     | -139.64708             | -139.67048 | 0.00528                             | 0.00500 |
| BH <sub>2</sub> CHO                | C <sub>s</sub>  | 1     | -139.69483             | -139.72013 | 0.00523                             | 0.00538 |
| BH <sub>2</sub> OC                 | C <sub>2v</sub> | 2     | -139.03573             | -139.05168 | 0.00545                             | 0.00514 |
| BH <sub>3</sub> OC                 | C <sub>3v</sub> | 1     | -139.70374             | -139.72506 | 0.00754                             | 0.00668 |
| BH <sub>2</sub> OCH                | C <sub>s</sub>  | 1     | -139.64784             | -139.66299 | 0.00502                             | 0.00546 |
| BH <sub>2</sub> OCH <sub>2</sub>   | C <sub>1</sub>  | 2     | -140.29401             | -140.32278 | 0.00537                             | 0.00547 |
| BH <sub>3</sub> OCH <sub>2</sub>   | C <sub>s</sub>  | 1     | -140.88347             | -140.91223 | 0.00589                             | 0.00565 |
| BH <sub>2</sub> OCH <sub>3</sub>   | C <sub>s</sub>  | 1     | -140.95150             | -140.98178 | 0.00538                             | 0.00536 |
| BH <sub>2</sub> NCH                | C <sub>s</sub>  | 2     | -119.21832             | -119.24398 | 0.00502                             | 0.00491 |
| BH <sub>3</sub> NCH                | C <sub>3v</sub> | 1     | -119.83433             | -119.85332 | 0.00543                             | 0.00536 |
| BH <sub>2</sub> NCH <sub>2</sub>   | C <sub>2v</sub> | 1     | -119.86778             | -119.89399 | 0.00517                             | 0.00500 |
| BH <sub>2</sub> CNH                | C <sub>s</sub>  | 2     | -119.21424             | -119.23856 | 0.00504                             | 0.00497 |
| BH <sub>3</sub> CNH                | C <sub>3v</sub> | 1     | -119.83411             | -119.85834 | 0.00549                             | 0.00515 |

|                                                   |                 |   |            |            |         |         |
|---------------------------------------------------|-----------------|---|------------|------------|---------|---------|
| BH <sub>2</sub> CNH <sub>2</sub>                  | C <sub>2v</sub> | 1 | -119.80878 | -119.83586 | 0.00528 | 0.00501 |
| BH <sub>2</sub> CHNH                              | C <sub>s</sub>  | 1 | -119.82235 | -119.84674 | 0.00509 | 0.00494 |
| BH <sub>2</sub> O(CH <sub>3</sub> ) <sub>2</sub>  | C <sub>1</sub>  | 2 |            | -180.67987 |         | 0.00755 |
| BH <sub>3</sub> O(CH <sub>3</sub> ) <sub>2</sub>  | C <sub>s</sub>  | 1 |            | -181.34638 |         | 0.00743 |
| BH <sub>2</sub> NCCH <sub>3</sub>                 | C <sub>s</sub>  | 2 |            | -158.49385 |         | 0.00643 |
| BH <sub>3</sub> NCCH <sub>3</sub>                 | C <sub>3v</sub> | 1 |            | -159.11238 |         | 0.00703 |
| BH <sub>2</sub> S(CH <sub>3</sub> ) <sub>2</sub>  | C <sub>1</sub>  | 2 |            | -503.32159 |         | 0.00808 |
| BH <sub>3</sub> S(CH <sub>3</sub> ) <sub>2</sub>  | C <sub>s</sub>  | 1 |            | -503.97478 |         | 0.00817 |
| BH <sub>2</sub> OC(CH <sub>3</sub> ) <sub>2</sub> | C <sub>1</sub>  | 2 |            | -218.81399 |         | 0.00822 |
| BH <sub>3</sub> OC(CH <sub>3</sub> ) <sub>2</sub> | C <sub>s</sub>  | 1 |            | -219.41957 |         | 0.00841 |
| BH <sub>2</sub> N(CH <sub>3</sub> ) <sub>3</sub>  | C <sub>s</sub>  | 2 |            | -200.08546 |         | 0.00790 |
| BH <sub>3</sub> N(CH <sub>3</sub> ) <sub>3</sub>  | C <sub>3v</sub> | 1 |            | -200.75000 |         | 0.00790 |
| BH <sub>2</sub> P(CH <sub>3</sub> ) <sub>3</sub>  | C <sub>s</sub>  | 2 |            | -486.36736 |         | 0.01001 |
| BH <sub>3</sub> P(CH <sub>3</sub> ) <sub>3</sub>  | C <sub>3v</sub> | 1 |            | -487.01613 |         | 0.00995 |
| BH <sub>2</sub> OS(CH <sub>3</sub> ) <sub>2</sub> | C <sub>1</sub>  | 2 |            | -578.43472 |         | 0.00877 |
| BH <sub>3</sub> OS(CH <sub>3</sub> ) <sub>2</sub> | C <sub>1</sub>  | 1 |            | -579.09587 |         | 0.00881 |
| BH <sub>2</sub> -THF                              | C <sub>1</sub>  | 2 |            | -257.97436 |         | 0.00826 |
| BH <sub>3</sub> -THF                              | C <sub>1</sub>  | 1 |            | -258.64017 |         | 0.00822 |
| BH <sub>2</sub> -pyridine                         | C <sub>2v</sub> | 2 |            | -273.85723 |         | 0.00698 |
| BH <sub>3</sub> -pyridine                         | C <sub>s</sub>  | 1 |            | -274.46831 |         | 0.00736 |

**Notes:** (a) Enthalpies at absolute zero, in Hartrees. (b) Increments in enthalpies on going from absolute zero to 298 K, in Hartrees. (c) These values are taken from Curtiss, L. A.; Raghavachari, K.; Trucks, G. W.; Pople, J. A. *J. Chem. Phys.* **1991**, *94*, 7221-7230 and are reproduced here only for the reader's convenience.



**Table B.** Atomic charges, QCISD/6-311+G\*\*(6D).

| Species                           | AIM             |        | NPA             |        |
|-----------------------------------|-----------------|--------|-----------------|--------|
|                                   | BH <sub>n</sub> | X      | BH <sub>n</sub> | X      |
| H <sub>3</sub> N-BH <sub>3</sub>  | -0.103          | +0.099 | -0.356          | +0.356 |
| H <sub>3</sub> N-BH <sub>2</sub>  | -0.058          | +0.057 | -0.320          | +0.320 |
| Change                            | +0.045          | -0.042 | +0.036          | -0.036 |
| H <sub>2</sub> O-BH <sub>3</sub>  | -0.076          | +0.082 | -0.245          | +0.245 |
| H <sub>2</sub> O-BH <sub>2</sub>  | -0.062          | +0.057 | -0.227          | +0.227 |
| Change                            | +0.014          | -0.025 | +0.018          | -0.018 |
| H <sub>3</sub> P-BH <sub>3</sub>  | -0.139          | +0.141 | -0.616          | +0.616 |
| H <sub>3</sub> P-BH <sub>2</sub>  | +0.089          | -0.089 | -0.499          | +0.499 |
| Change                            | +0.228          | -0.230 | +0.117          | -0.117 |
| OC-BH <sub>3</sub>                | +0.141          | -0.142 | -0.455          | +0.455 |
| OC-BH <sub>2</sub>                | +0.564          | -0.565 | -0.127          | +0.127 |
| Change                            | +0.423          | -0.423 | +0.328          | -0.328 |
| H <sub>2</sub> CO-BH <sub>3</sub> | -0.051          | +0.056 | -0.246          | +0.246 |
| H <sub>2</sub> CO-BH <sub>2</sub> | +0.753          | -0.750 | +0.370          | -0.370 |
| Change                            | +0.804          | -0.806 | +0.616          | -0.616 |
| HCN-BH <sub>3</sub>               | +0.020          | -0.019 | -0.309          | +0.309 |
| HCN-BH <sub>2</sub>               | +0.695          | -0.695 | +0.220          | -0.220 |
| Change                            | +0.675          | -0.676 | +0.529          | -0.529 |
| HNC-BH <sub>3</sub>               | +0.077          | -0.077 | -0.474          | +0.474 |
| HNC-BH <sub>2</sub>               | +0.593          | -0.593 | -0.048          | +0.048 |
| Change                            | +0.516          | -0.516 | +0.426          | -0.426 |

**Table C.** Differences in atomic charges resulting from difference density geometry modifications (based on QCISD/6-311+G\*\*(6D)//MP2/6-31G\* NPA charges).

| Complex                           | Species           | Atoms     |                        |                        |  |
|-----------------------------------|-------------------|-----------|------------------------|------------------------|--|
| H <sub>3</sub> B-BH <sub>3</sub>  | BH <sub>3</sub>   | B: +0.036 | H: -0.012              |                        |  |
|                                   | BH <sub>3</sub>   | B: +0.036 | H: -0.012              |                        |  |
| H <sub>3</sub> B-BH <sub>2</sub>  | BH <sub>2</sub>   | B: -0.003 | H: +0.001              |                        |  |
|                                   | BH <sub>3</sub>   | B: +0.022 | H: -0.007              |                        |  |
| H <sub>3</sub> N-BH <sub>3</sub>  | BH <sub>3</sub>   | B: +0.032 | H: -0.011              |                        |  |
|                                   | NH <sub>3</sub>   | N: +0.010 | H: -0.003              |                        |  |
| H <sub>3</sub> N-BH <sub>2</sub>  | BH <sub>2</sub>   | B: -0.008 | H: +0.004              |                        |  |
|                                   | NH <sub>3</sub>   | N: +0.008 | H: -0.003 <sup>a</sup> |                        |  |
| H <sub>2</sub> O-BH <sub>3</sub>  | BH <sub>3</sub>   | B: +0.020 | H: -0.007 <sup>a</sup> |                        |  |
|                                   | H <sub>2</sub> O  | O: +0.006 | H: -0.003              |                        |  |
| H <sub>2</sub> O-BH <sub>2</sub>  | BH <sub>2</sub>   | B: -0.006 | H: +0.003 <sup>a</sup> |                        |  |
|                                   | H <sub>2</sub> O  | O: +0.006 | H: -0.003 <sup>a</sup> |                        |  |
| H <sub>3</sub> P-BH <sub>3</sub>  | BH <sub>3</sub>   | B: +0.028 | H: -0.009              |                        |  |
|                                   | PH <sub>3</sub>   | P: +0.011 | H: -0.004              |                        |  |
| H <sub>3</sub> P-BH <sub>2</sub>  | BH <sub>2</sub>   | B: -0.002 | H: +0.001              |                        |  |
|                                   | PH <sub>3</sub>   | P: +0.012 | H: -0.004 <sup>a</sup> |                        |  |
| OC-BH <sub>3</sub>                | BH <sub>3</sub>   | B: +0.029 | H: -0.010              |                        |  |
|                                   | CO                | C: +0.001 | O: -0.001              |                        |  |
| OC-BH <sub>2</sub>                | BH <sub>2</sub>   | B: -0.003 | H: +0.002              |                        |  |
|                                   | CO                | C: -0.005 | O: +0.005              |                        |  |
| H <sub>2</sub> CO-BH <sub>3</sub> | BH <sub>3</sub>   | B: +0.021 | H: -0.007 <sup>a</sup> |                        |  |
|                                   | H <sub>2</sub> CO | O: +0.004 | C: +0.012              | H: -0.008 <sup>a</sup> |  |
| H <sub>2</sub> CO-BH <sub>2</sub> | BH <sub>2</sub>   | B: -0.007 | H: +0.003 <sup>a</sup> |                        |  |
|                                   | H <sub>2</sub> CO | O: +0.003 | C: +0.070              | H: -0.037 <sup>a</sup> |  |
| HCN-BH <sub>3</sub>               | BH <sub>3</sub>   | B: +0.028 | H: -0.009              |                        |  |
|                                   | HCN               | N: +0.001 | C: -0.001              | H: 0.000               |  |
| HCN-BH <sub>2</sub>               | BH <sub>2</sub>   | B: -0.008 | H: +0.004              |                        |  |
|                                   | HCN               | N: -0.040 | C: +0.047              | H: -0.007              |  |
| HNC-BH <sub>3</sub>               | BH <sub>3</sub>   | B: +0.034 | H: -0.011              |                        |  |
|                                   | HNC               | C: +0.005 | N: -0.005              | H: 0.000               |  |
| HNC-BH <sub>2</sub>               | BH <sub>2</sub>   | B: -0.007 | H: +0.004              |                        |  |
|                                   | HNC               | C: -0.034 | N: +0.021              | H: +0.013              |  |

**Notes:** a. Average value for slightly different hydrogen atoms.

**Table D.** HOMO energies of Lewis bases (Hartrees).<sup>a</sup>

| Lewis Base                     | HF <sup>b</sup> | HF/NBO <sup>b,c</sup> | QCISD/NBO <sup>c,d</sup> |
|--------------------------------|-----------------|-----------------------|--------------------------|
| H <sub>3</sub> N               | 0.09852         | -0.52359              | -0.52187                 |
| H <sub>2</sub> O <sup>e</sup>  | 0.14267         | -0.71688              | -0.71662                 |
| H <sub>3</sub> P               | 0.06317         | -0.55901              | -0.56928                 |
| OC <sup>f</sup>                | 0.07838         | -0.66950              | -0.67398                 |
| CO <sup>g</sup>                | 0.07838         | -1.04540              | -1.05222                 |
| H <sub>2</sub> CO <sup>e</sup> | 0.06553         | -0.72953              | -0.73361                 |
| HCN                            | 0.06008         | -0.75520              | -0.76160                 |
| HNC                            | 0.06230         | -0.60309              | -0.60654                 |

**Notes:**

- a. All calculations were performed at the MP2/6-31G\* optimized geometries.  
b. Hartree-Fock calculations performed using the 6-311+G(3df,2p) basis set.  
c. NBO implies orbitals were localized according to the NBO procedure of Weinhold.  
d. QCISD calculations performed using the 6-311+G\*\*(6D) basis set.  
e. The average energy of the two lone pairs on oxygen was used for the localized (NBO) orbital energies.  
f. Lone pair on the carbon end.  
g. Lone pair on the oxygen end.

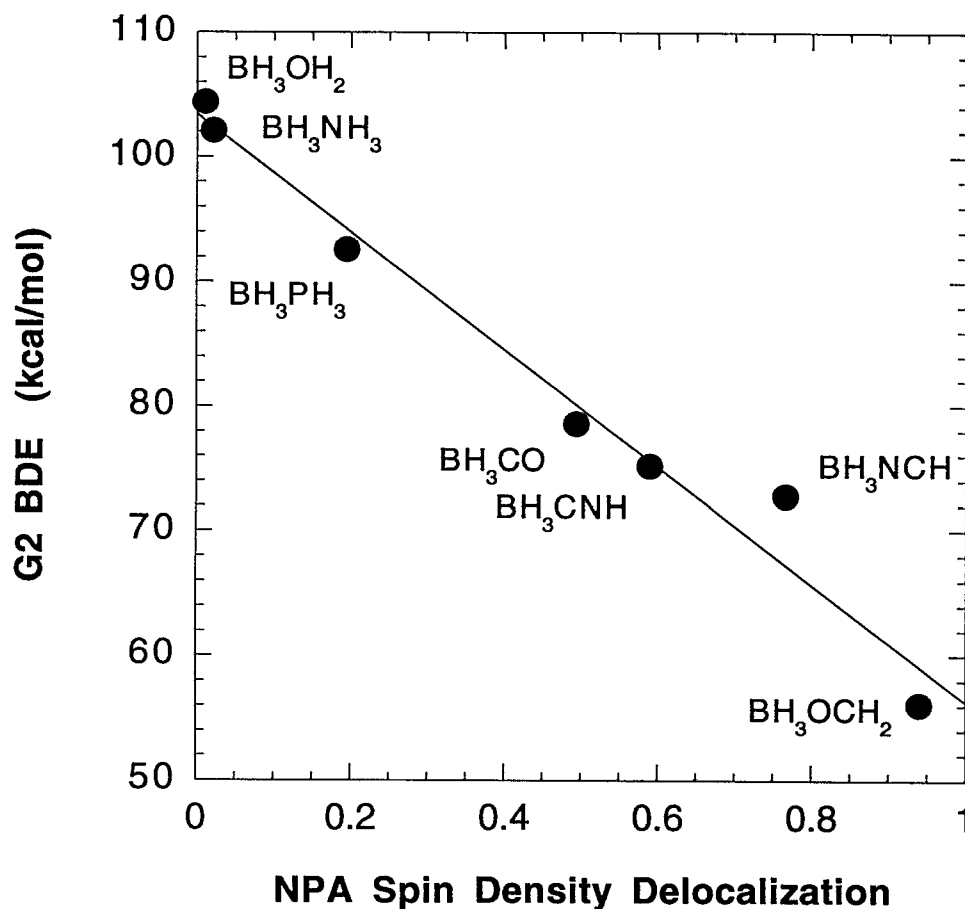

**Figure A**

**Figure A.** Plot of calculated B-H bond dissociation enthalpy versus spin density delocalization calculated via the NPA procedure. The enthalpies were calculated via the G2 procedure and correspond to absolute zero. The spin density populations were computed using QCISD/6-311+G\*\*(6D) wave functions at the MP2/6-31G\* optimized geometries. The spin density delocalization is defined here as the total quantity of  $\alpha$  spin density on atoms other than the  $\text{BH}_2$  fragment. Correlation coefficient = 0.97.

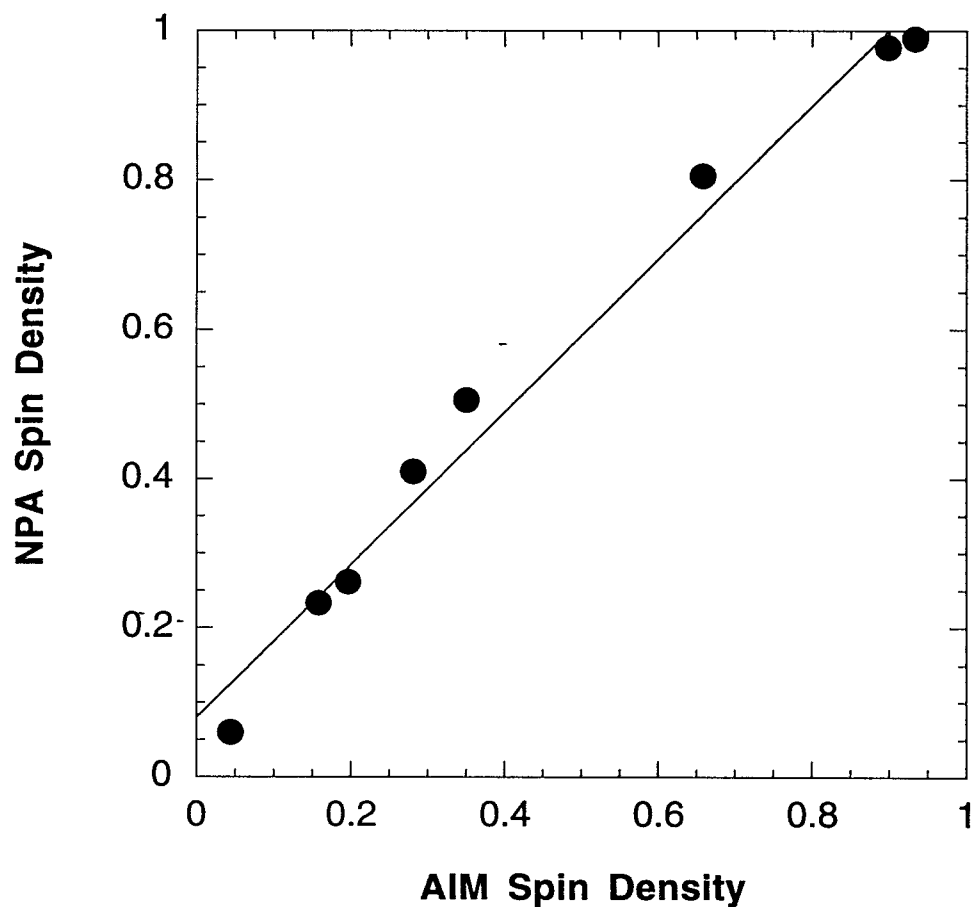

**Figure B**

**Figure B.** Plot of NPA spin density versus AIM spin density. The spin density populations are for the BH<sub>2</sub> fragments and were computed using QCISD/6-311+G\*\*(6D) wave functions at the MP2/6-31G\* optimized geometries. Best fit equation:  $\text{NPA} = 1.022 * \text{AIM} + 0.080$ ; correlation coefficient = 0.98.

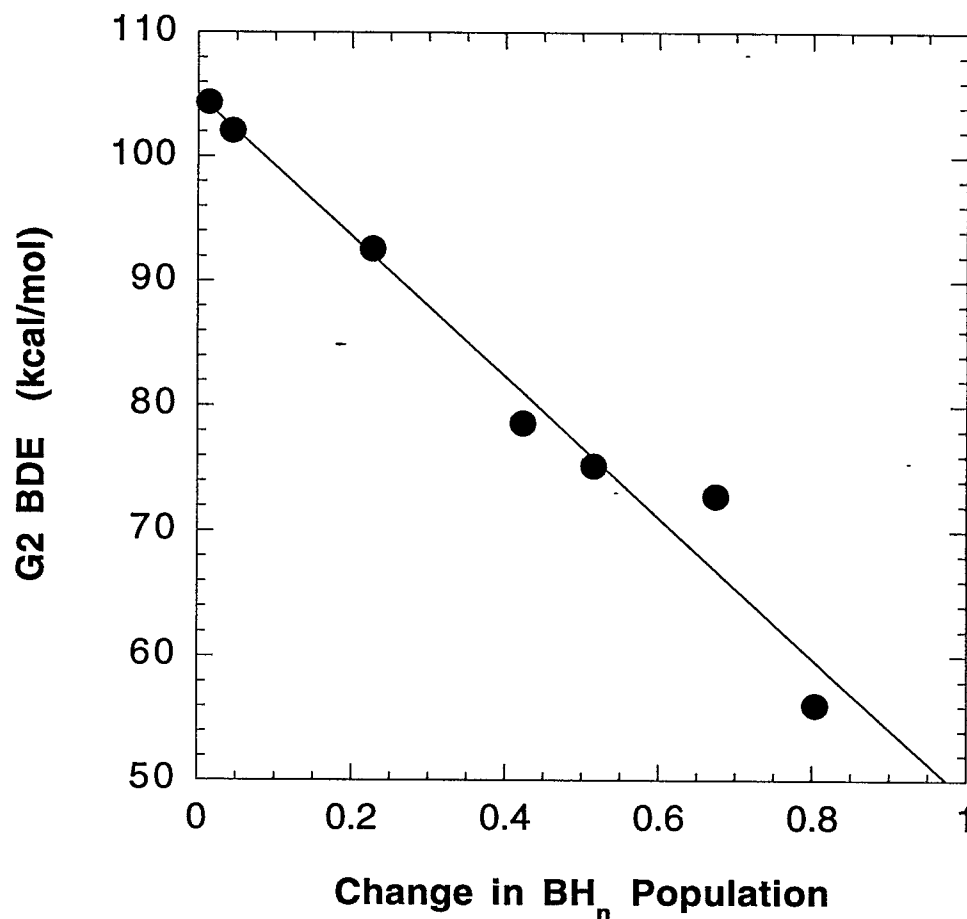

**Figure C**

**Figure C.** Plot of calculated B-H bond dissociation enthalpy versus change in BH<sub>n</sub> population upon hydrogen abstraction. The enthalpies were calculated via the G2 procedure and correspond to absolute zero. The atomic populations were computed using the AIM procedure and QCISD/6-311+G\*\*(6D) wave functions at the MP2/6-31G\* optimized geometries. The population difference is defined here as the BH<sub>3</sub> population in the closed-shell complex minus the BH<sub>2</sub> population in the corresponding radical obtained by abstraction of a single hydrogen atom from boron. Correlation coefficient = 0.97.

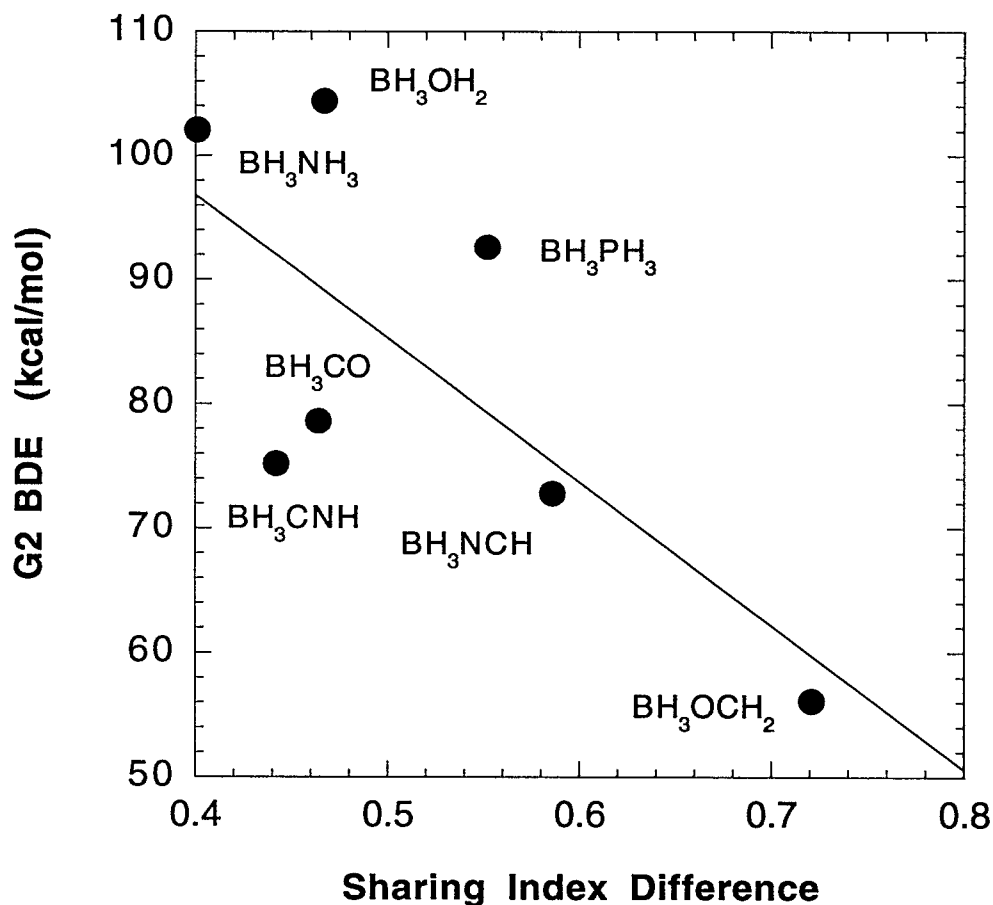

**Figure D**

**Figure D.** Plot of B-H bond dissociation enthalpy versus sharing index difference. The BDE's were calculated via the G2 procedure and correspond to absolute zero. The sharing indices were computed using QCISD/6-311+G\*\*(6D) wave functions at the MP2/6-31G\* optimized geometries. The sharing index difference is defined as the B-X sharing index in the closed-shell complex minus the B-X sharing index in the corresponding radical obtained by abstraction of a single hydrogen atom from boron. Correlation coefficient = 0.53.

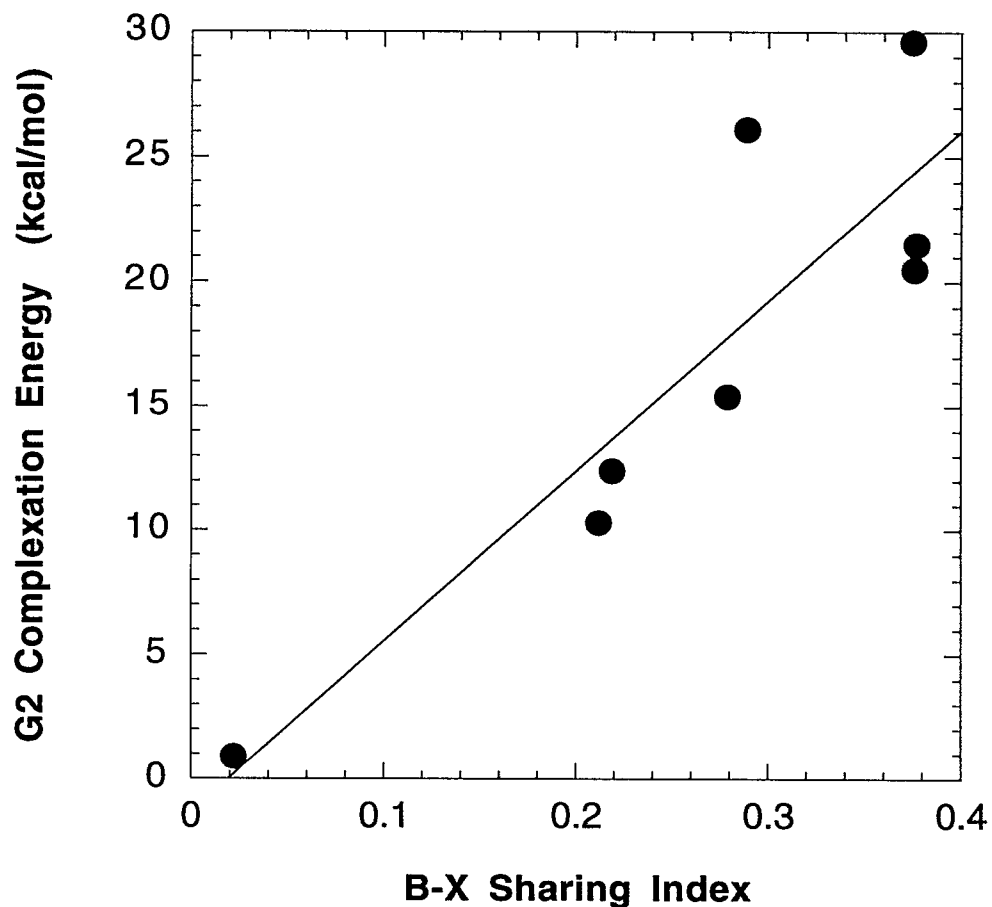

**Figure E**

**Figure E.** Plot of calculated complexation enthalpy of borane radical with various Lewis bases versus the calculated sharing index for the B-X bond. The enthalpies were calculated via the G2 procedure and correspond to absolute zero. The sharing indices were computed using QCISD/6-311+G\*\*(6D) wave functions at the MP2/6-31G\* optimized geometries. Correlation coefficient = 0.27.



**MP2/6-31G\* Optimized Geometries (G-2 calculations):**

+++++

-----  
BH2 C2V G2 calculation  
-----Molecule:  
-----

Stoichiometry = BH2(2)  
 Charge = 0  
 Multiplicity = 2  
 Alpha Electrons = 4  
 Alpha Valence = 3  
 Beta Electrons = 3  
 Beta Valence = 2

Z-matrix: MP2  
-----

```

0  2
B
- H      1      rbh      -
  H      1      rbh      2      a
  
```

rbh = 1.188294  
 a = 127.651137

+++++

-----  
BH3 D3H G2 calculation  
-----Molecule:  
-----

Stoichiometry = BH3  
 Charge = 0  
 Multiplicity = 1  
 Alpha Electrons = 4  
 Alpha Valence = 3  
 Beta Electrons = 4  
 Beta Valence = 3

Z-matrix: MP2  
-----

```

0  1
B
H      1      rbh
H      1      rbh      2      a
H      1      rbh      2      a      3      t      0
  
```

rbh = 1.191189  
 a = 120.000000  
 t = 180.000000

+++++

-----  
 Diborane radical (B2H5) C2V symmetry G2 calculation  
 -----

Molecule:  
 -----

Stoichiometry = B2H5(2)  
 Charge = 0  
 Multiplicity = 2  
 Alpha Electrons = 8  
 Alpha Valence = 6  
 Beta Electrons = 7  
 Beta Valence = 5

Z-matrix: MP2  
 -----

|   |   |      |   |     |   |      |   |
|---|---|------|---|-----|---|------|---|
| 0 | 2 |      |   |     |   |      |   |
| X |   |      |   |     |   |      |   |
| H | 1 | 1.   |   |     |   |      |   |
| B | 2 | rbh1 | 1 | a1  |   |      |   |
| B | 2 | rbh1 | 1 | a1  | 3 | 180. | 0 |
| X | 3 | 1.   | 2 | 90. | 1 | 0.   | 0 |
| H | 3 | rbh2 | 2 | a2  | 5 | t1   | 0 |
| H | 3 | rbh2 | 2 | a2  | 5 | -t1  | 0 |
| X | 4 | 1.   | 2 | 90. | 1 | 0.   | 0 |
| H | 4 | rbh2 | 2 | a2  | 8 | t1   | 0 |
| H | 4 | rbh2 | 2 | a2  | 8 | -t1  | 0 |

rbh1 = 1.322885  
 rbh2 = 1.186729  
 t1 = 73.504535  
 a1 = 138.270464  
 a2 = 111.356457

++++  
 -----  
 Diborane (B2H6) D2H symmetry G-2 calculation  
 -----

Molecule:  
 -----

Stoichiometry = B2H6  
 Charge = 0  
 Multiplicity = 1  
 Alpha Electrons = 8  
 Alpha Valence = 6  
 Beta Electrons = 8  
 Beta Valence = 6

Z-matrix: MP2  
 -----

|   |   |     |   |     |   |        |
|---|---|-----|---|-----|---|--------|
| 0 | 1 |     |   |     |   |        |
| X |   |     |   |     |   |        |
| X | 1 | 1.  |   |     |   |        |
| B | 1 | rbx | 2 | 90. |   |        |
| B | 1 | rbx | 2 | 90. | 3 | 180. 0 |

|   |   |     |   |     |   |      |   |
|---|---|-----|---|-----|---|------|---|
| H | 1 | rhx | 2 | 90. | 3 | 90.  | 0 |
| H | 1 | rhx | 2 | 90. | 3 | -90. | 0 |
| H | 3 | rbh | 1 | a1  | 2 | 0.   | 0 |
| H | 3 | rbh | 1 | a1  | 2 | 180. | 0 |
| H | 4 | rbh | 1 | a1  | 2 | 0.   | 0 |
| H | 4 | rbh | 1 | a1  | 2 | 180. | 0 |

rbh = 1.189461  
rhx = 0.974465  
rbx = 0.874705  
a1 = 119.168539

-----  
+++++

Ammonia C3V G2

Molecule:

-----  
Stoichiometry = H3N  
Charge = 0  
Multiplicity = 1  
Alpha Electrons = 5  
Beta Electrons = 5

Z-matrix:

-----  
0 1  
N  
H 1 r  
H 1 r 2 a  
H 1 r 2 a 3 a 1

r = 1.017028  
a = 106.332730

-----  
+++++

Water C2V G2

Molecule:

-----  
Stoichiometry = H2O  
Charge = 0  
Multiplicity = 1  
Alpha Electrons = 5  
Beta Electrons = 5

Z-matrix:

-----  
0 1  
O  
H 1 r  
H 1 r 2 a

r = 0.968580  
a = 103.961947

-----  
+++++

Phosphine C3V G2  
-----

Molecule:

-----  
Stoichiometry = H3P  
Charge = 0  
Multiplicity = 1  
Alpha Electrons = 9  
Beta Electrons = 9

Z-matrix:

-----  
0 1  
P  
H 1 r  
H 1 r 2 a  
H 1 r 2 a 3 a 1

r = 1.414610  
a = 94.645437

-----  
+++++

H2S C2V G2  
-----

Molecule:

-----  
Stoichiometry = H2S  
Charge = 0  
Multiplicity = 1  
Alpha Electrons = 9  
Beta Electrons = 9

Z-matrix:

-----  
0 1  
S  
H 1 r  
H 1 r 2 a

r = 1.339462  
a = 93.332139

-----  
+++++

Carbon monoxide C\*V G2  
-----

Molecule:

```

-----
Stoichiometry   = CO
Charge          = 0
Multiplicity     = 1
Alpha Electrons  = 7
Beta Electrons   = 7

```

Z-matrix:

```

-----
0      1
C
O      1      r

```

r = 1.150245

+++++

Formaldehyde C2V G2

Molecule:

```

-----
Stoichiometry   = CH2O
Charge          = 0
Multiplicity     = 1
Alpha Electrons  = 8
Beta Electrons   = 8

```

Z-matrix:

```

-----
0      1
C
O      1      r1
H      1      r2      2      a1
H      1      r2      2      a1      3      180.      0

```

r1 = 1.219903

r2 = 1.104127

a1 = 122.193159

+++++

Hydrogen cyanide C\*V MP2/6-31G\*

Molecule:

```

-----
Stoichiometry   = CHN
Charge          = 0
Multiplicity     = 1
Alpha Electrons  = 7
Beta Electrons   = 7

```

Z-matrix:

```

0      1
N
C      1      r1
X      2      1.      1      90.
H      2      r2      3      90.      1      180.      0

```

r1 = 1.177281

r2 = 1.069333

```

-----
+++++
-----

```

HNC C\*V MP2/6-31G\* G2

Molecule:

```

-----
Stoichiometry   = CHN
Charge          = 0
Multiplicity    = 1
Alpha Electrons = 7
Beta Electrons  = 7

```

Z-matrix:

```

-----
0      1
C
N      1      r1
X      2      1.      1      90.
H      2      r2      3      90.      1      180.      0

```

r1 = 1.186701

r2 = 1.002240

```

-----
+++++
-----

```

Aminoborane radical complex (BH<sub>2</sub>NH<sub>3</sub>) Cs G-2 calculation

Molecule:

```

-----
Stoichiometry   = BH5N(2)
Charge          = 0
Multiplicity    = 2
Alpha Electrons = 9
Alpha Valence   = 7
Beta Electrons  = 8
Beta Valence    = 6

```

Z-matrix: MP2

```

-----
0  2
B
N      1      rbn
X      1      1.      2      90.
H      1      rbh      2      a1      3      t1      0
H      1      rbh      2      a1      3      -t1     0

```

|   |   |      |   |    |   |     |   |
|---|---|------|---|----|---|-----|---|
| H | 2 | rnh1 | 1 | a2 | 3 | t2  | 0 |
| H | 2 | rnh2 | 1 | a3 | 6 | t3  | 0 |
| H | 2 | rnh2 | 1 | a3 | 6 | -t3 | 0 |

```
rbh = 1.199728
rnh1 = 1.024204
rnh2 = 1.019853
rbn = 1.636639
t1 = 113.020002
t3 = 120.499437
a1 = 108.465339
a2 = 113.155903
a3 = 110.481636
t2 = 180.000000
```

-----  
 +-----+

Aminoborane complex (BH<sub>3</sub>NH<sub>3</sub>) C3V G-2 calculation

Molecule:

```
-----
Stoichiometry   = BH6N
Charge           = 0
Multiplicity     = 1
Alpha Electrons  = 9
Alpha Valence    = 7
Beta Electrons   = 9
Beta Valence     = 7
```

Z-matrix: MP2

```
-----
0  1
B
N      1      rbn
H      1      rbh      2      a1
H      1      rbh      2      a1      3      t1      0
H      1      rbh      2      a1      3      -t1      0
H      2      rnh      1      a2      3      t2      0
H      2      rnh      1      a2      6      t1      0
H      2      rnh      1      a2      6      -t1      0
```

```
rbh = 1.209193
rbn = 1.660439
rnh = 1.019768
a1 = 104.600963
a2 = 111.060612
t1 = 120.000000
t2 = 180.000000
```

-----  
 +-----+

Water-borane complex radical (BH<sub>2</sub>OH<sub>2</sub>) C1 G2

Molecule:

-----

Stoichiometry = BH4O(2)  
 Charge = 0  
 Multiplicity = 2  
 Alpha Electrons = 9  
 Beta Electrons = 8

Z-matrix:

```

-----
0      2
B
O      1      rbo
H      1      rbh1      2      a1
H      1      rbh2      2      a2      3      t1      0
H      2      roh1      1      a3      3      t2      0
H      2      roh2      1      a4      4      t3      0
  
```

rbo = 1.702294  
 rbh1 = 1.199704  
 rbh2 = 1.193567  
 roh1 = 0.974935  
 roh2 = 0.976919  
 a1 = 105.273008  
 a2 = 103.815783  
 a3 = 106.697139  
 a4 = 109.290769  
 t1 = 130.527573  
 t2 = 52.739149  
 t3 = -291.431322

++++++  
 -----  
 Water-borane complex G2  
 -----

Molecule:

-----  
 Stoichiometry = BH5O  
 Charge = 0  
 Multiplicity = 1  
 Alpha Electrons = 9  
 Beta Electrons = 9

Z-matrix:

```

-----
0      1
B
O      1      rbo
H      1      rbh1      2      a1
H      1      rbh2      2      a2      3      t1      0
H      1      rbh2      2      a2      3      -t1      0
H      2      roh      1      a3      3      t2      0
H      2      roh      1      a3      3      -t2      0
  
```

rbo = 1.729126  
 rbh1 = 1.207190  
 rbh2 = 1.200851



```

roh = 0.974797
a1 = 102.698909
a2 = 101.124266
a3 = 107.175455
t1 = 119.922892
t2 = 56.779612

```

```

-----
+++++

```

```

-----
PH3-Borane radical complex (BH2PH3) Cs G-2 calculation
-----

```

Molecule:

```

-----
Stoichiometry   = BH5P(2)
Charge          = 0
Multiplicity    = 2
Alpha Electrons = 13
Alpha Valence   = 7
Beta Electrons  = 12
Beta Valence    = 6

```

Z-matrix: MP2

```

-----
0  2
B
P      1      rbp
X      1      1.      90.
H      1      rbh      2      a1      3      t1      0
H      1      rbh      2      a1      3      -t1     0
H      2      rph1     1      a2      3      180.     0
H      2      rph2     1      a3      6      t3      0
H      2      rph2     1      a3      6      -t3     0

```

```

rbp = 1.860631
rbh = 1.189449
rph1 = 1.425028
rph2 = 1.404788
a1 = 115.990033
a2 = 124.957454
a3 = 114.875221
t1 = 96.401992
t3 = 120.867553

```

```

-----
+++++

```

```

-----
PH3-Borane complex (BH3PH3) C3V G-2 calculation
-----

```

Molecule:

```

-----
Stoichiometry   = BH6P
Charge          = 0
Multiplicity    = 1
Alpha Electrons = 13
Alpha Valence   = 7
Beta Electrons  = 13

```

Beta Valence = 7

Z-matrix: MP2

```

0 1
B
P      1      rbp
H      1      rbh      2      a1
H      1      rbh      2      a1      3      120.      0
H      1      rbh      2      a1      3      -120.      0
H      2      rph      1      a2      3      180.      0
H      2      rph      1      a2      6      120.      0
H      2      rph      1      a2      6      -120.      0

```

rbp = 1.943458  
rbh = 1.206313  
rph = 1.403799  
a1 = 103.919108  
a2 = 117.723637

+++++

H2S-Borane complex radical (BH2-SH2) Cs MP2/6-31G\* fopt

Molecule:

-----  
Stoichiometry = BH4S(2)  
Charge = 0  
Multiplicity = 2  
Alpha Electrons = 13  
Beta Electrons = 12

Z-matrix:

```

0      2
B
S      1      rbs
H      1      rbh1      2      a1
H      1      rbh2      2      a2      3      180.      0
H      2      rsh1      1      a3      3      0.      0
H      2      rsh2      1      a4      3      180.      0

```

rbs = 1.771663  
rbh1 = 1.189049  
rbh2 = 1.189240  
rsh1 = 4.213782  
rsh2 = 1.341380  
a1 = 116.325009  
a2 = 121.178907  
a3 = 175.404365  
a4 = 99.230979

+++++

H2S-Borane complex Cs G2

-----  
Molecule:

-----  
Stoichiometry = BH5S  
Charge = 0  
Multiplicity = 1  
Alpha Electrons = 13  
Beta Electrons = 13

Z-matrix:

-----  
0 1  
B  
S 1 rbc  
H 1 rbh1 2 a1  
H 1 rbh2 2 a2 3 t1 0  
H 1 rbh2 2 a2 3 -t1 0  
H 2 rsh 1 a3 3 t2 0  
H 2 rsh 1 a3 3 -t2 0

rbc = 2.565319  
rbh1 = 1.191423  
rbh2 = 1.191076  
rsh = 1.325632  
a1 = 95.643804  
a2 = 94.500289  
a3 = 100.614505  
t1 = 120.069061  
t2 = 48.439348

-----  
+++++  
-----  
CO-Borane radical complex (BH2CO) C2V G-2 calculation  
-----

Molecule:

-----  
Stoichiometry = CH2BO(2)  
Charge = 0  
Multiplicity = 2  
Alpha Electrons = 11  
Alpha Valence = 8  
Beta Electrons = 10  
Beta Valence = 7

Z-matrix: MP2

-----  
0 2  
B  
C 1 rbc  
H 1 rbh 2 a1  
H 1 rbh 2 a1 3 180. 0  
O 1 rbo 3 a1 2 0. 0

rbc = 1.481726

```
rbh = 1.187798
rbo = 2.647800
a1 = 116.890727
```

```
-----
+++++
```

```
CO-Borane complex (BH3CO) C3V G-2 calculation
-----
```

```
Molecule:
-----
```

```
Stoichiometry   = CH3BO
Charge           = 0
Multiplicity     = 1
Alpha Electrons  = 11
Alpha Valence    = 8
Beta Electrons   = 11
Beta Valence     = 8
```

```
Z-matrix: MP2
-----
```

```
0  2
B
C      1      rbc      -
H      1      rbh      2      a1
H      1      rbh      2      a1      3      120.      0
H      1      rbh      2      a1      3      -120.     0
O      1      rbo      3      a1      2      0.         0
```

```
rbc = 1.546843
rbh = 1.205734
rbo = 2.694923
a1 = 104.138721
-----
```

```
+++++
```

```
BH2-C=OH Cs G2
-----
```

```
Molecule:
-----
```

```
Stoichiometry   = CH3BO
Charge           = 0
Multiplicity     = 1
Alpha Electrons  = 11
Beta Electrons   = 11
```

```
Z-matrix:
-----
```

```
0      1
B
C      1      r1
X      2      1.      1      90.
O      2      r2      3      a1      1      180.      0
H      1      r3      2      a2      3      t1      0
H      1      r3      2      a2      3      -t1      0
```

H            4            r4            2            a3            3            0.            0

r1 = 1.394057  
r2 = 1.275671  
r3 = 1.192757  
r4 = 0.985796  
a1 = 93.734817  
a2 = 117.530379  
a3 = 111.381199  
t1 = 89.257564

-----  
+++++  
-----  
BH2-CH=O Cs perpendicular G2  
-----

Molecule:

-----  
Stoichiometry    = CH3BO  
Charge            = 0  
Multiplicity     = 1  
Alpha Electrons   = 11  
Beta Electrons    = 11

Z-matrix:

-----  
O            1  
B  
C            1            r1  
O            2            r2            1            a1  
H            1            r3            2            a2            3            t1            0  
H            1            r3            2            a2            3            -t1           0  
H            2            r4            1            a3            3            180.           0

r1 = 1.590782  
r2 = 1.197294  
r3 = 1.186478  
r4 = 1.100159  
a1 = 120.196452  
a2 = 119.683100  
a3 = 120.373651  
t1 = 89.695519

-----  
+++++  
-----  
OC-Borane complex radical (BH2-OC) C2V G2  
-----

Molecule:

-----  
Stoichiometry    = CH2BO(2)  
Charge            = 0  
Multiplicity     = 2  
Alpha Electrons   = 11  
Beta Electrons    = 10

Z-matrix:

```

-----
0          2
B
O          1          rbo
H          1          rbh          2          a1
H          1          rbh          2          a1          3          180.          0
C          1          rbc          3          a1          2          0.          0

```

```

rbo = 1.375479
rbh = 1.185511
rbc = 2.617132
a1 = 116.156416

```

```

-----
+++++
-----

```

```

OC-Borane complex (BH3CO) C3V G2
-----

```

Molecule:

```

-----
Stoichiometry    = CH3BO
Charge           = 0
Multiplicity     = 1
Alpha Electrons  = 11
Beta Electrons   = 11

```

Z-matrix:

```

-----
0          1
B
O          1          rbo
H          1          rbh          2          a1
H          1          rbh          2          a1          3          120.          0
H          1          rbh          2          a1          3          -120.          0
C          1          rbc          3          a1          2          0.          0

```

```

rbo = 2.585920
rbh = 1.191044
rbc = 3.736529
a1 = 90.969066

```

```

-----
+++++
-----

```

```

BH2OCH Cs MP2/6-31G* fopt
-----

```

Molecule:

```

-----
Stoichiometry    = CH3BO
Charge           = 0
Multiplicity     = 1
Alpha Electrons  = 11
Beta Electrons   = 11

```

Z-matrix:

```

-----

```

|   |   |    |   |    |   |      |   |
|---|---|----|---|----|---|------|---|
| 0 | 1 |    |   |    |   |      |   |
| B |   |    |   |    |   |      |   |
| O | 1 | r1 |   |    |   |      |   |
| C | 2 | r2 | 1 | a1 |   |      |   |
| H | 1 | r3 | 2 | a2 | 3 | 180. | 0 |
| H | 1 | r4 | 2 | a3 | 3 | 0.   | 0 |
| H | 3 | r5 | 2 | a4 | 1 | 180. | 0 |

r1 = 1.406247  
 r2 = 1.347838  
 r3 = 1.188961  
 r4 = 1.186419  
 r5 = 1.115765  
 a1 = 115.954123  
 a2 = 114.937687  
 a3 = 119.842903  
 a4 = 101.749729

+++++

H2CO-Borane radical complex (BH2OCH2) C1 G2

Molecule:

-----  
 Stoichiometry = CH4BO(2)  
 Charge = 0  
 Multiplicity = 2  
 Alpha Electrons = 12  
 Beta Electrons = 11

Z-matrix:

|   |   |      |   |    |   |    |   |
|---|---|------|---|----|---|----|---|
| 0 | 2 |      |   |    |   |    |   |
| B |   |      |   |    |   |    |   |
| O | 1 | rbo  |   |    |   |    |   |
| H | 1 | rbh1 | 2 | a1 |   |    |   |
| H | 1 | rbh2 | 2 | a2 | 3 | t1 | 0 |
| C | 2 | rco  | 1 | a3 | 3 | t2 | 0 |
| H | 5 | rch1 | 2 | a4 | 1 | t3 | 0 |
| H | 5 | rch2 | 2 | a5 | 6 | t4 | 0 |

rbo = 1.361330  
 rbh1 = 1.197174  
 rbh2 = 1.190434  
 rco = 1.373948  
 rch1 = 1.082467  
 rch2 = 1.079019  
 a1 = 120.209208  
 a2 = 116.251945  
 a3 = 121.942861  
 a4 = 117.876713  
 a5 = 114.213709  
 t1 = 180.288919  
 t2 = -2.257247  
 t3 = 10.757934

t4 = 154.954996

+++++

-----  
H2CO-Borane complex (BH3OCH2) Cs G2  
-----

Molecule:

-----  
Stoichiometry = CH5BO  
Charge = 0  
Multiplicity = 1  
Alpha Electrons = 12  
Beta Electrons = 12

Z-matrix:

-----  
0 1  
B  
O 1 rbo  
H 1 rbh1 2 a1  
H 1 rbh2 2 a2 3 t1 0  
H 1 rbh2 2 a2 3 -t1 0  
C 2 rco 1 a3 3 0. 0  
H 6 rch1 2 a4 1 0. 0  
H 6 rch2 2 a5 7 180. 0rbo = 1.686060  
rbh1 = 1.208547  
rbh2 = 1.201164  
rco = 1.233081  
rch1 = 1.092875  
rch2 = 1.091981  
a1 = 102.766828  
a2 = 101.256954  
a3 = 120.533239  
a4 = 120.851363  
a5 = 118.829924  
t1 = 120.333538

+++++

-----  
BH2-O-CH3 Cs G2  
-----

Molecule:

-----  
Stoichiometry = CH5BO  
Charge = 0  
Multiplicity = 1  
Alpha Electrons = 12  
Beta Electrons = 12

Z-matrix:

-----  
0 1



|   |   |    |   |    |   |      |   |
|---|---|----|---|----|---|------|---|
| B |   |    |   |    |   |      |   |
| O | 1 | r1 |   |    |   |      |   |
| C | 2 | r2 | 1 | a1 |   |      |   |
| H | 1 | r3 | 2 | a2 | 3 | 0.   | 0 |
| H | 1 | r4 | 2 | a3 | 3 | 180. | 0 |
| H | 3 | r5 | 2 | a4 | 1 | 0.   | 0 |
| H | 3 | r6 | 2 | a5 | 6 | t1   | 0 |
| H | 3 | r6 | 2 | a5 | 6 | -t1  | 0 |

r1 = 1.349328  
 r2 = 1.430177  
 r3 = 1.200052  
 r4 = 1.192901  
 r5 = 1.092744  
 r6 = 1.091139  
 a1 = 121.373824  
 a2 = 120.804315  
 a3 = 116.462314  
 a4 = 111.205616  
 a5 = 108.308888  
 t1 = 120.853995

-----  
 ++++++  
 -----  
 HCN-borane radical complex (BH2NCH) Cs MP2/6-31G\* fopt  
 -----

Molecule:

-----  
 Stoichiometry = CH3BN(2)  
 Charge = 0  
 Multiplicity = 2  
 Alpha Electrons = 11  
 Beta Electrons = 10

Z-matrix:

|   |   |    |   |    |   |      |   |
|---|---|----|---|----|---|------|---|
| O | 2 |    |   |    |   |      |   |
| B |   |    |   |    |   |      |   |
| N | 1 | r1 |   |    |   |      |   |
| C | 2 | r2 | 1 | a1 |   |      |   |
| H | 1 | r3 | 2 | a2 | 3 | t1   | 0 |
| H | 1 | r3 | 2 | a2 | 3 | -t1  | 0 |
| H | 3 | r4 | 2 | a3 | 1 | 180. | 0 |

r1 = 1.402691  
 r2 = 1.194101  
 r3 = 1.191373  
 r4 = 1.096865  
 a1 = 173.674751  
 a2 = 118.288569  
 a3 = 131.041125  
 t1 = 90.496568

-----  
 ++++++  
 -----  
 HCN-borane complex (BH3NCH) C3V G2

-----  
Molecule:-----  
Stoichiometry = CH4BN  
Charge = 0  
Multiplicity = 1  
Alpha Electrons = 11  
Beta Electrons = 11

## Z-matrix:-----

|   |   |     |   |    |   |       |   |
|---|---|-----|---|----|---|-------|---|
| 0 | 1 |     |   |    |   |       |   |
| B |   |     |   |    |   |       |   |
| N | 1 | rbn |   |    |   |       |   |
| H | 1 | rbh | 2 | a1 |   |       |   |
| H | 1 | rbh | 2 | a1 | 3 | 120.  | 0 |
| H | 1 | rbh | 2 | a1 | 3 | -120. | 0 |
| C | 1 | r3  | 3 | a1 | 2 | 0.    | 0 |
| H | 1 | r4  | 3 | a1 | 2 | 0.    | 0 |

rbn = 1.587458  
rbh = 1.205276  
r3 = 2.752305  
r4 = 3.821607  
a1 = 103.841613

-----  
+++++-----  
BH2-N=CH2 C2V G2  
-----

## Molecule:

-----  
Stoichiometry = CH4BN  
Charge = 0  
Multiplicity = 1  
Alpha Electrons = 11  
Beta Electrons = 11

## Z-matrix:-----

|   |   |    |   |     |   |      |   |
|---|---|----|---|-----|---|------|---|
| 0 | 1 |    |   |     |   |      |   |
| B |   |    |   |     |   |      |   |
| N | 1 | r1 |   |     |   |      |   |
| X | 2 | 1. | 1 | 90. |   |      |   |
| C | 2 | r2 | 3 | 90. | 1 | 180. | 0 |
| H | 1 | r3 | 2 | a1  | 3 | 0.   | 0 |
| H | 1 | r3 | 2 | a1  | 3 | 180. | 0 |
| H | 4 | r4 | 2 | a2  | 3 | 90.  | 0 |
| H | 4 | r4 | 2 | a2  | 3 | -90. | 0 |

r1 = 1.363306  
r2 = 1.256382  
r3 = 1.193875  
r4 = 1.093109

a1 = 118.445843  
a2 = 121.544017

-----  
+++++

HNC-borane radical complex (BH<sub>2</sub>CNH) Cs MP2/6-31G\* fopt  
-----

Molecule:

-----  
Stoichiometry = CH<sub>3</sub>BN(2)  
Charge = 0  
Multiplicity = 2  
Alpha Electrons = 11  
Beta Electrons = 10

Z-matrix:

-----  
0 2  
B  
C 1 r1  
N 2 r2 1 a1  
H 1 r3 2 a2 3 t1 0  
H 1 r3 2 a2 3 -t1 0  
H 3 r4 2 a3 1 180. 0

r1 = 1.479150  
r2 = 1.210232  
r3 = 1.191248  
r4 = 1.017850  
a1 = 174.172882  
a2 = 118.134240  
a3 = 132.026488  
t1 = 90.486908

-----  
+++++

HNC-borane complex (BH<sub>3</sub>CNH) C3V G2  
-----

Molecule:

-----  
Stoichiometry = CH<sub>4</sub>BN  
Charge = 0  
Multiplicity = 1  
Alpha Electrons = 11  
Beta Electrons = 11

Z-matrix:

-----  
0 1  
B  
C 1 rbc  
H 1 rbh 2 a1  
H 1 rbh 2 a1 3 120. 0  
H 1 rbh 2 a1 3 -120. 0

|   |   |    |   |    |   |    |   |
|---|---|----|---|----|---|----|---|
| N | 1 | r3 | 3 | a1 | 2 | 0. | 0 |
| H | 1 | r4 | 3 | a1 | 2 | 0. | 0 |

rbc = 1.559977  
 rbh = 1.208515  
 r3 = 2.731762  
 r4 = 3.733346  
 a1 = 105.264468

-----  
 ++++++

-----  
 BH2-C=NH2 C2V G2  
 -----

Molecule:

-----  
 Stoichiometry = CH4BN  
 Charge = 0  
 Multiplicity = 1  
 Alpha Electrons = 11  
 Beta Electrons = 11

Z-matrix:

-----  
 0 1  
 B  
 C 1 r1  
 X 2 1. 1 90.  
 N 2 r2 3 90. 1 180. 0  
 H 1 r3 2 a1 3 0. 0  
 H 1 r3 2 a1 3 180. 0  
 H 4 r4 2 a2 3 90. 0  
 H 4 r4 2 a2 3 -90. 0

r1 = 1.406795  
 r2 = 1.280770  
 r3 = 1.194755  
 r4 = 1.020366  
 a1 = 118.571237  
 a2 = 122.719371

-----  
 ++++++

-----  
 BH2-CH=NH Z Cs G2  
 -----

Molecule:

-----  
 Stoichiometry = CH4BN  
 Charge = 0  
 Multiplicity = 1  
 Alpha Electrons = 11  
 Beta Electrons = 11

Z-matrix:

-----

|   |   |    |   |    |   |      |   |
|---|---|----|---|----|---|------|---|
| O | 1 |    |   |    |   |      |   |
| B |   |    |   |    |   |      |   |
| C | 1 | r1 |   |    |   |      |   |
| N | 2 | r2 | 1 | a1 |   |      |   |
| H | 1 | r3 | 2 | a2 | 3 | 0.   | 0 |
| H | 1 | r4 | 2 | a3 | 4 | 180. | 0 |
| H | 2 | r5 | 1 | a4 | 3 | 180. | 0 |
| H | 3 | r6 | 2 | a5 | 1 | 0.   | 0 |

r1 = 1.578997  
r2 = 1.264137  
r3 = 1.190826  
r4 = 1.188045  
r5 = 1.083451  
r6 = 1.008108  
a1 = 124.176655  
a2 = 118.716346  
a3 = 121.437692  
a4 = 120.361189  
a5 = 111.049915

---

**HF/3-21G\* Optimized Geometries (CBS-4 calculations):**

+++++

-----  
Borane radical (BH2) C2V HF/3-21G\* fopt  
-----Molecule:  
-----

Stoichiometry = BH2(2)  
 Charge = 0  
 Multiplicity = 2  
 Alpha Electrons = 4  
 Beta Electrons = 3

Z-matrix:  
-----

|   |   |   |   |   |  |
|---|---|---|---|---|--|
| 0 | 2 |   |   |   |  |
| B |   |   |   |   |  |
| H | 1 | r |   |   |  |
| H | 1 | r | 2 | a |  |

r = 1.185003  
 a = 127.640240

+++++

-----  
Borane D3H HF/3-21G\* fopt  
-----Molecule:  
-----

Stoichiometry = BH3  
 Charge = 0  
 Multiplicity = 1  
 Alpha Electrons = 4  
 Beta Electrons = 4

Z-matrix:  
-----

|   |   |   |   |      |   |        |
|---|---|---|---|------|---|--------|
| 0 | 1 |   |   |      |   |        |
| B |   |   |   |      |   |        |
| H | 1 | r |   |      |   |        |
| H | 1 | r | 2 | 120. |   |        |
| H | 1 | r | 2 | 120. | 3 | 180. 0 |

r = 1.187676

+++++

-----  
Diborane radical (B2H5) C2V HF/3-21G\* fopt  
-----Molecule:  
-----

Stoichiometry = B2H5(2)  
 Charge = 0  
 Multiplicity = 2  
 Alpha Electrons = 8  
 Beta Electrons = 7

Z-matrix:

```

-----
0      2
X
H      1      1.
B      2      rbh1      1      a1
B      2      rbh1      1      a1      3      180.      0
X      3      1.      2      90.      1      0.      0
H      3      rbh2      2      a2      5      t1      0
H      3      rbh2      2      a2      5      -t1      0
X      4      1.      2      90.      1      0.      0
H      4      rbh2      2      a2      8      t1      0
H      4      rbh2      2      a2      8      -t1      0
  
```

rbh1 = 1.324365  
 rbh2 = 1.180405  
 a1 = 137.352814  
 a2 = 111.488847  
 t1 = 73.849028

+++++

Diborane (B2H6) D2H HF/3-21G\* fopt

Molecule:

Stoichiometry = B2H6  
 Charge = 0  
 Multiplicity = 1  
 Alpha Electrons = 8  
 Beta Electrons = 8

Z-matrix:

```

-----
0      1
X
X      1      1.
B      1      rbx      2      90.
B      1      rbx      2      90.      3      180.      0
H      1      rhx      2      90.      3      90.      0
H      1      rhx      2      90.      3      -90.      0
H      3      rbh      1      a1      2      0.      0
H      3      rbh      1      a1      2      180.      0
H      4      rbh      1      a1      2      0.      0
H      4      rbh      1      a1      2      180.      0
  
```

rbx = 0.892423  
 rhx = 0.965080  
 rbh = 1.182257

a1 = 118.832591

-----  
 +-----+

Ammonia C3V CBS-4

Molecule:

-----  
 Stoichiometry = H3N  
 Charge = 0  
 Multiplicity = 1  
 Alpha Electrons = 5  
 Beta Electrons = 5

Z-matrix:

-----  
 0 1  
 N  
 H 1 r  
 H 1 r 2 a  
 H 1 r 2 a 3 a 1

r = 1.002587  
 a = 112.396114

-----  
 +-----+

Water C2V CBS-4

Molecule:

-----  
 Stoichiometry = H2O  
 Charge = 0  
 Multiplicity = 1  
 Alpha Electrons = 5  
 Beta Electrons = 5

Z-matrix:

-----  
 0 1  
 O  
 H 1 r  
 H 1 r 2 a

r = 0.966599  
 a = 107.691109

-----  
 +-----+

Phosphine C3V CBS-4

Molecule:

-----



Stoichiometry = H3P  
 Charge = 0  
 Multiplicity = 1  
 Alpha Electrons = 9  
 Beta Electrons = 9

Z-matrix:

```

-----
0      1
P
H      1      r
H      1      r      2      a
H      1      r      2      a      3      a      1
  
```

r = 1.402456  
 a = 95.051350

```

-----
+++++
-----
H2S C2V CBS-4
-----
  
```

Molecule:

Stoichiometry = H2S  
 Charge = 0  
 Multiplicity = 1  
 Alpha Electrons = 9  
 Beta Electrons = 9

Z-matrix:

```

-----
0      1
S
H      1      r
H      1      r      2      a
  
```

r = 1.326863  
 a = 94.202796

```

-----
+++++
-----
Carbon monoxide C*V CBS-4
-----
  
```

Molecule:

Stoichiometry = CO  
 Charge = 0  
 Multiplicity = 1  
 Alpha Electrons = 7  
 Beta Electrons = 7

Z-matrix:
